# Supplementary material
Source: PubMed Central journal article supplement (PMC3659948)
Supplement: supp_2012.077917_2012_077917-Contributions.pdf [file supp_2012.077917_2012_077917-Contributions.pdf]

**Manuscript no. HAEMATOL/2012/077917 entitled “Phase II study of CNS-directed chemotherapy including high-dose chemotherapy with autologous stem cell transplantation for CNS relapse of aggressive lymphomas”**

**Authors: Agnieszka Korfel, Thomas Elter, Eckhard Thiel, Mathias Hänel, Robert Möhle, Roland Schroers, Marcel Reiser, Martin Dreyling, Jan Eucker, Christian W. Scholz, Bernd Metzner, Alexander Röth, Josef Birkmann, Uwe Schlegel, Peter Martus, Gerald Illerhaus, and Lars Fischer**

**Information about the contributions of each person named as having participated in the study**

**1) Guarantor(s), i.e., person(s) who is (are) responsible for the integrity of the work as a whole:**

- Agnieszka Korfel, Department of Hematology & Oncology, Charite Universitätsmedizin Berlin, Germany, [agnieszka.korfel@charite.de](mailto:agnieszka.korfel@charite.de)
- Lars Fischer, Department of Hematology & Oncology, Charite Universitätsmedizin Berlin, Germany, [lars.fischer@charite.de](mailto:lars.fischer@charite.de)

**The guarantors of this manuscript confirm that all persons designated as authors qualify for authorship, and that each author has participated sufficiently in the work to take public responsibility for appropriate portions of the content.**

**2) Authors who participated in the conception of the study: Agnieszka Korfel, Lars Fischer, Eckhard Thiel, Gerald Illerhaus**

**3) Design & Methods. The following authors were responsible for specific investigations (please detail):**

- Agnieszka Korfel, Thomas Elter, Matthias Hänel, Robert Möhle, Roland Schroers, Marcel Reiser, Martin Dreyling, Jan Eucker, Christian Scholz, Bernd Metzner, Alexander Röth, Josef Birkmann, Uwe Schlegel, Gerard Illerhaus, and Lars Fischer collected assembled data
- Peter Martus was responsible for the statistics

**4) Results. The following authors were responsible for specific portions of the results, including figures and tables (please indicate the person responsible for each figure and each table):**

- Agnieszka Korfel, Lars Fischer and Peter Martus analysed and interpreted data

**5) Writing the manuscript. The following authors were responsible for writing the manuscript:**

- Agnieszka Korfel and Lars Fischer were primarily responsible for writing of the manuscript

**6) Contributors Listed in Acknowledgments: (Examples of those who might be acknowledged include a person who provided purely technical help, writing assistance, or a department chair who provided only general support. Corresponding authors must declare whether they had assistance with the study design, data collection, data analysis, or manuscript preparation. If such assistance was available, the authors must disclose the identity of the individuals who provided this assistance and the entity that supported it. Financial and material support should also be acknowledged.)**

- Financial support was given by Mundipharma
- Data collection was supported by Brigitta Rieger and data analysis by Dieter Augustin
- Logistical support was given by Competence Network on Malignant Lymphoma (Kompetenznetz Maligne Lymphome) and Arbeitsgemeinschaft Internistische Onkologie
